# Supplementary material for: DDX6 Is Essential for Oocyte Development and Maturation in Locusta migratoria
Source: MDPI journal article supplement (doi:10.3390/insects12010070), 2021-01-14
Supplement: s1 [file s1]

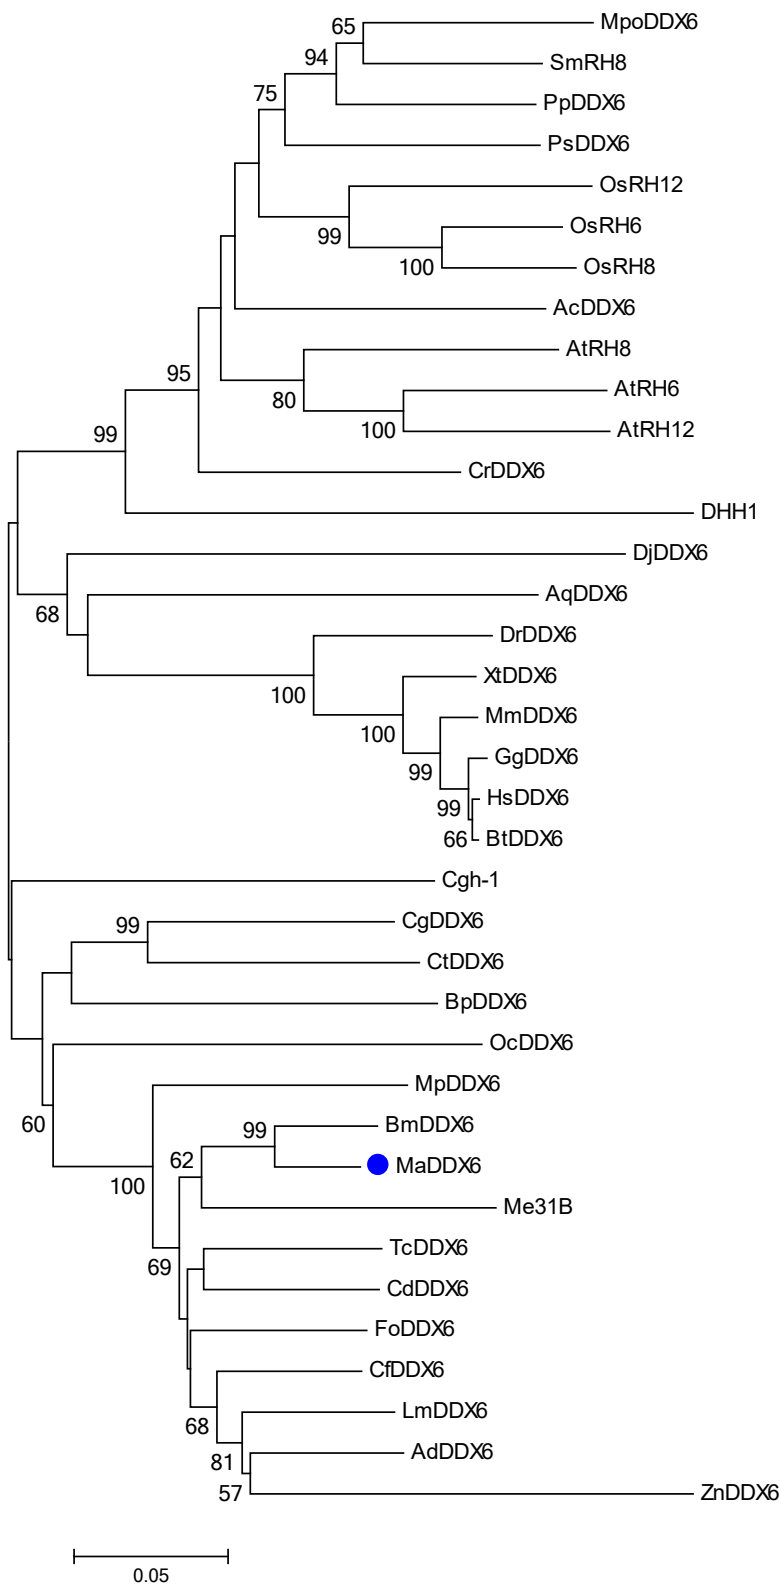

Figure S2. Phylogenetic tree of DDX6 orthologs. DDX6 protein sequences from different species were obtained from NCBI (National Center for Biotechnology Information) and a multiple sequence alignment was performed by using ClustalW software. The phylogenetic tree was generated by MEGA 6 by using the neighbor-joining method with 1,000 repetitions. The protein accession numbers are shown in Table 1. The filled blue circle indicates the DDX6 ortholog from *Microbacterium arborescens*.
