# Supplementary material for: DDX6 Is Essential for Oocyte Development and Maturation in Locusta migratoria
Source: MDPI journal article supplement (doi:10.3390/insects12010070), 2021-01-14
Supplement: s1 [file s1]

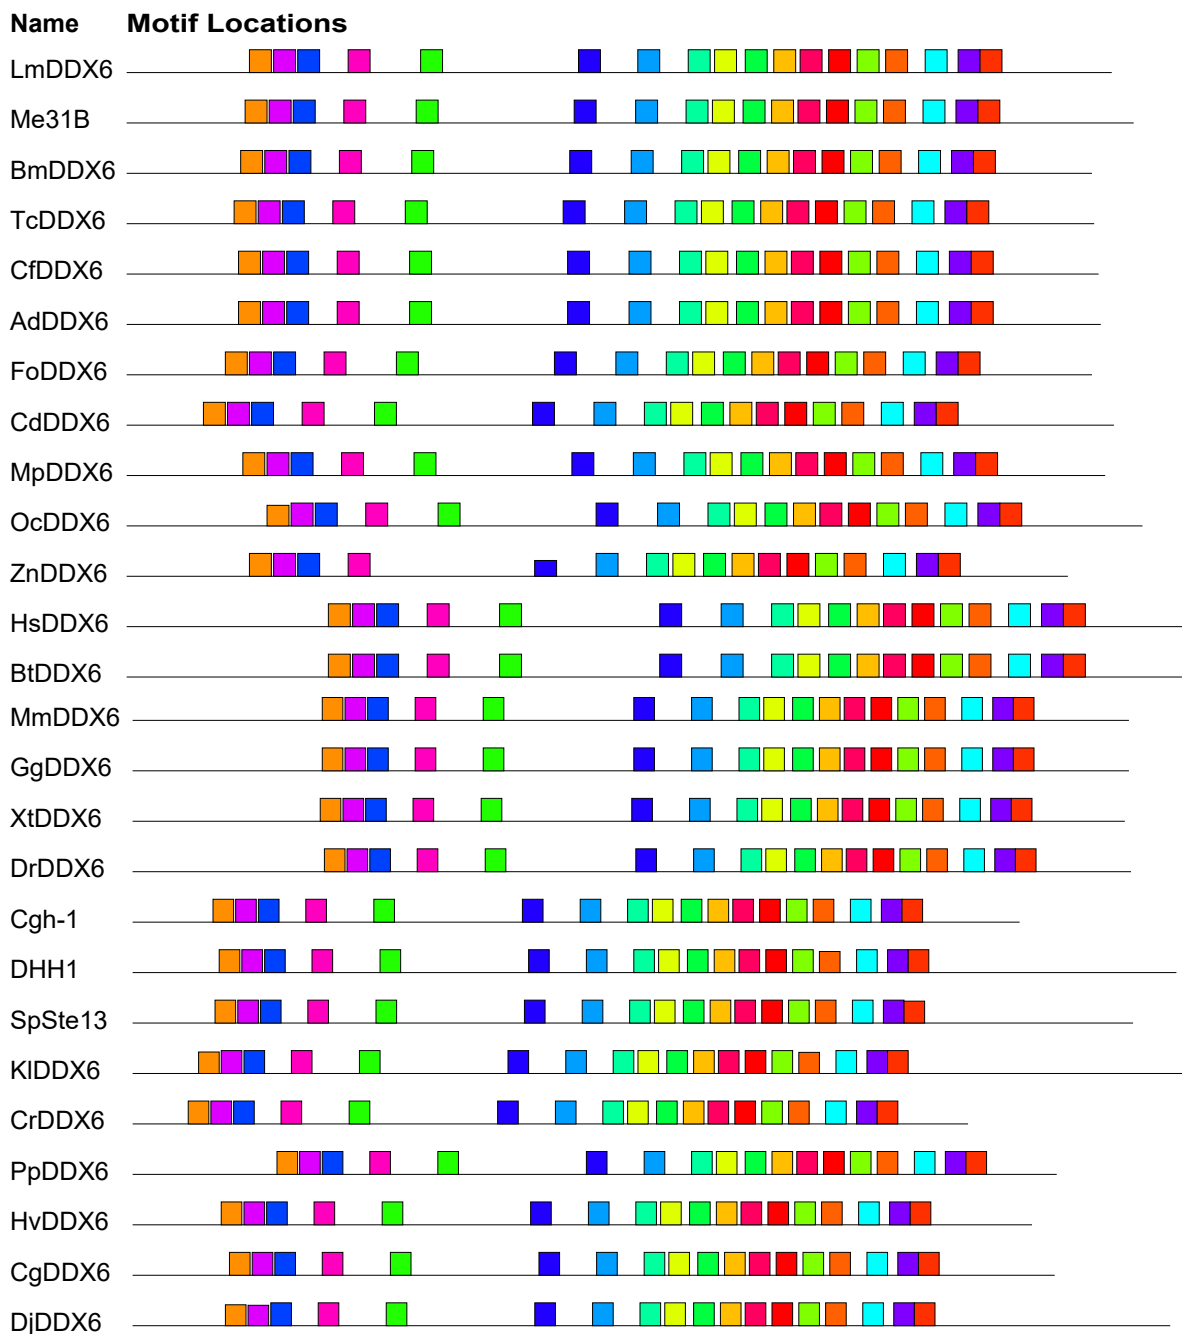

Figure S1. Motif pattern analysis of multiple DDX6 sequences from diverse species. Forty-eight sequences were used for the MEME analysis (<http://meme-suite.org/tools/meme>) (Supplemental file 1). The parameters were as follows: minimum width = 10, maximum width = 10, and the maximum number of motifs to find = 18.

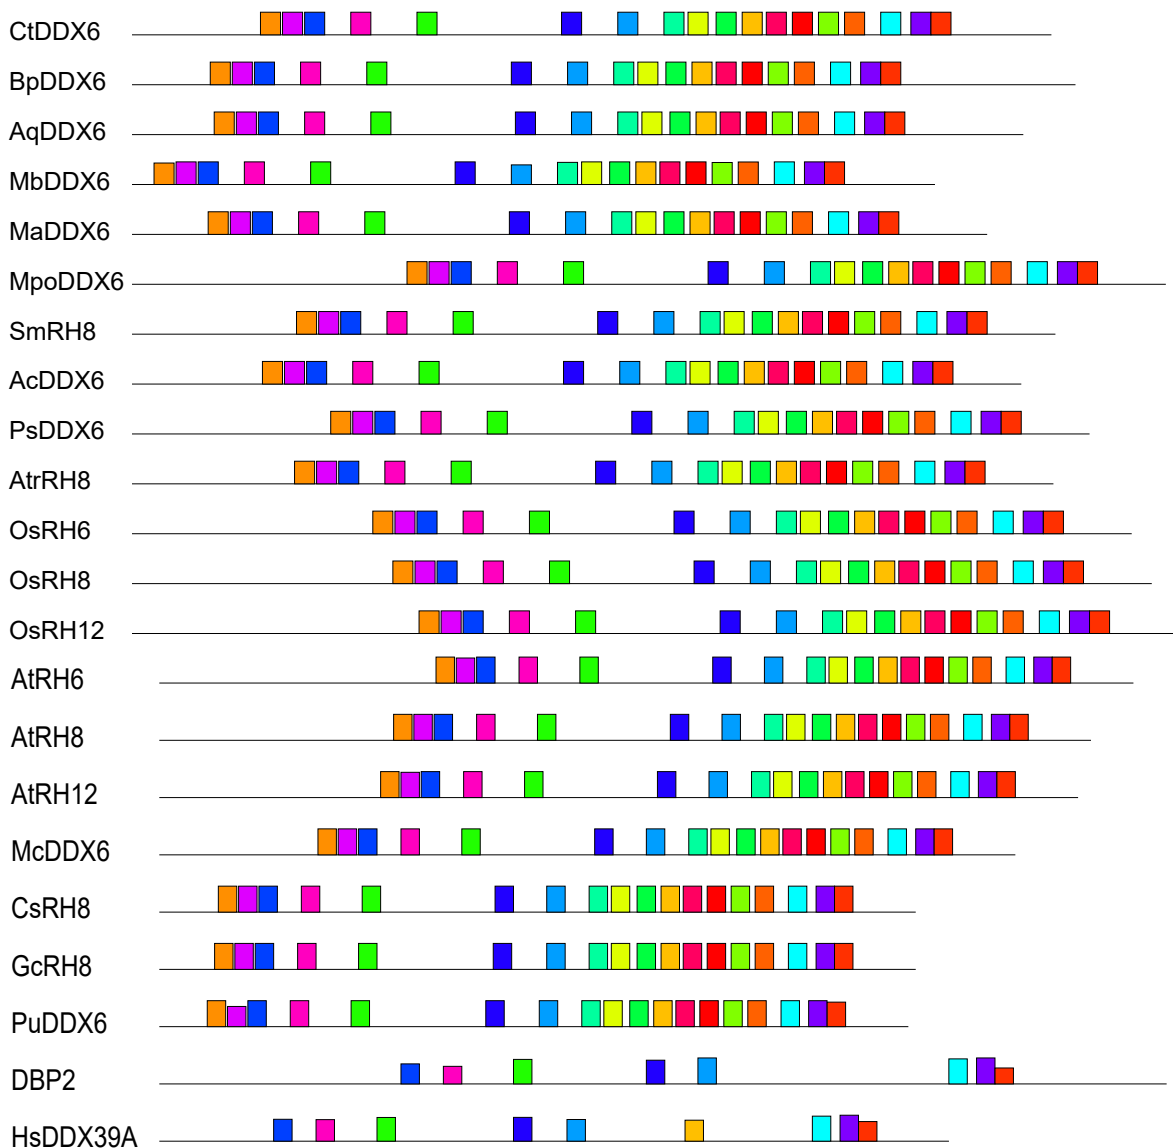

| Motif | Symbol                                                                              | Motif Consensus |     |                                                                                     |             |
|-------|-------------------------------------------------------------------------------------|-----------------|-----|-------------------------------------------------------------------------------------|-------------|
| 1.    |  | YSCFYIHAKM      | 10. |  | KGVTQYYAFV  |
| 2.    |  | VNVVINDFDP      | 11. |  | VPTR ELALQT |
| 3.    |  | HRNRVFHDFR      | 12. |  | PYEINLMEEL  |
| 4.    |  | YLHRIGRSGR      | 13. |  | QILLYSATFP  |
| 5.    |  | INQSIIFCNS      | 14. |  | VLDEADKLLS  |
| 6.    |  | KVHCLNTLFS      | 15. |  | KRELLMGIFE  |
| 7.    |  | GFEKPSPIQE      | 16. |  | RVELLAKKIT  |
| 8.    |  | ARAKNGTGKT      | 17. |  | FGHLGJAINL  |
| 9.    |  | CRNLVCSDLF      | 18. |  | TKGNEFEDYC  |
